# Supplementary material for: Microfluidic device for simultaneous analysis of neutrophil extracellular traps and production of reactive oxygen species
Source: Royal Society of Chemistry journal article supplement (doi:10.1039/c5ib00225g), 2016-01-01
Supplement: c5ib00225g1.pdf [file c5ib00225g1.pdf]

**Suppl. Video 1. *Pseudomonas aeruginosa* induced neutrophil migration.**

Time-lapse microscopic imaging of neutrophils with mCherry labeled *P. aeruginosa* with induced neutrophil migration, and ROS production as indicated by increasing DHR green fluorescence.

**Suppl. Figure 1. Stained neutrophils from whole blood captured on P-selectin.**

*A*, Sample fluorescent image of stained cells isolated from blood on P-selectin or BSA-coated surface. *B*, Percent neutrophils (+ CD11b, - CD14, - CD45) cells captured on P-selectin coating.

**Suppl. Figure 2. Dose-dependent PMA activation of neutrophils.**

Bar-plot of neutrophil reactive oxygen species (ROS) production at 30 minutes with varying PMA dosing.
